# Supplementary material for: Experimental severe malaria is resolved by targeting newly-identified monocyte subsets using immune-modifying particles combined with artesunate
Source: PubMed Central journal article supplement (PMC6292940; doi:10.1038/s42003-018-0216-2), 2018-12-13
Supplement: 42003_2018_216_MOESM1_ESM.pdf [file 42003_2018_216_MOESM1_ESM.pdf]

## Supplementary figure 1

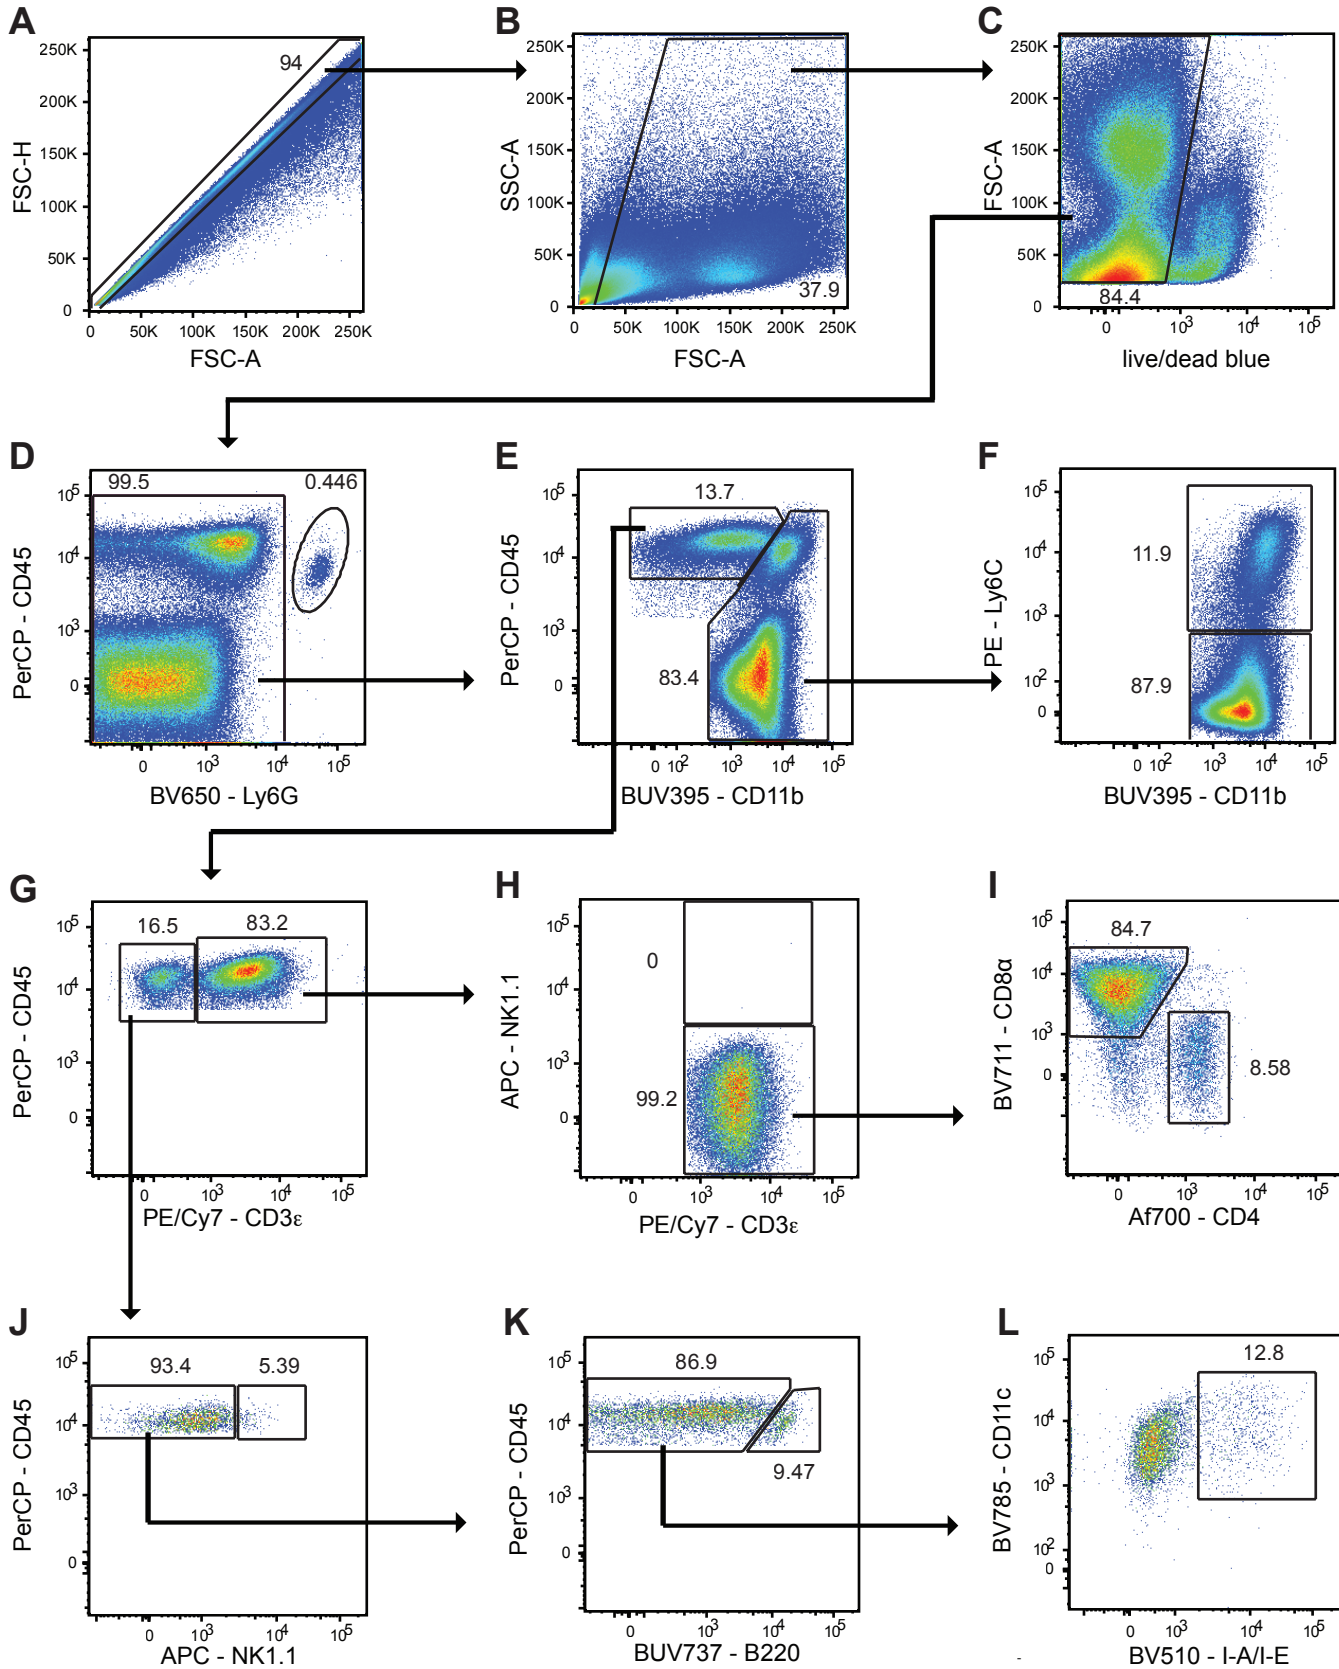

### Supplementary Figure 1. Gating strategy for brain populations

Representative sequential flow cytometric gating used to identify cell populations in the PbA-infected brain on d8 p.i. Doublets (**A**), debris (**B**) and dead cells (**C**) were excluded. Neutrophils were gated as Ly6G<sup>+</sup> CD45<sup>+</sup> cells (**D**) and the remaining population was further divided into CD11b<sup>+</sup> myeloid and CD45<sup>hi</sup> lymphocytes (**E**). Myeloid cells were split into Ly6C<sup>lo</sup> and Ly6C<sup>hi</sup> cells (**F**). CD3 $\epsilon$ <sup>+</sup> cells (**G**) were split into CD3 $\epsilon$ <sup>+</sup> NK1.1<sup>+</sup> NKT cells and CD3 $\epsilon$ <sup>+</sup> NK1.1<sup>-</sup> T cells (**H**). T cells were further characterised as CD4<sup>+</sup> or CD8<sup>+</sup> T cells (**I**). CD3 $\epsilon$ <sup>-</sup> cells were identified as NK1.1<sup>+</sup> NK cells (**J**), B220<sup>+</sup> B cells (**K**) and CD11c<sup>+</sup> MHC-II<sup>+</sup> classical DC (**L**).

## Supplementary figure 2

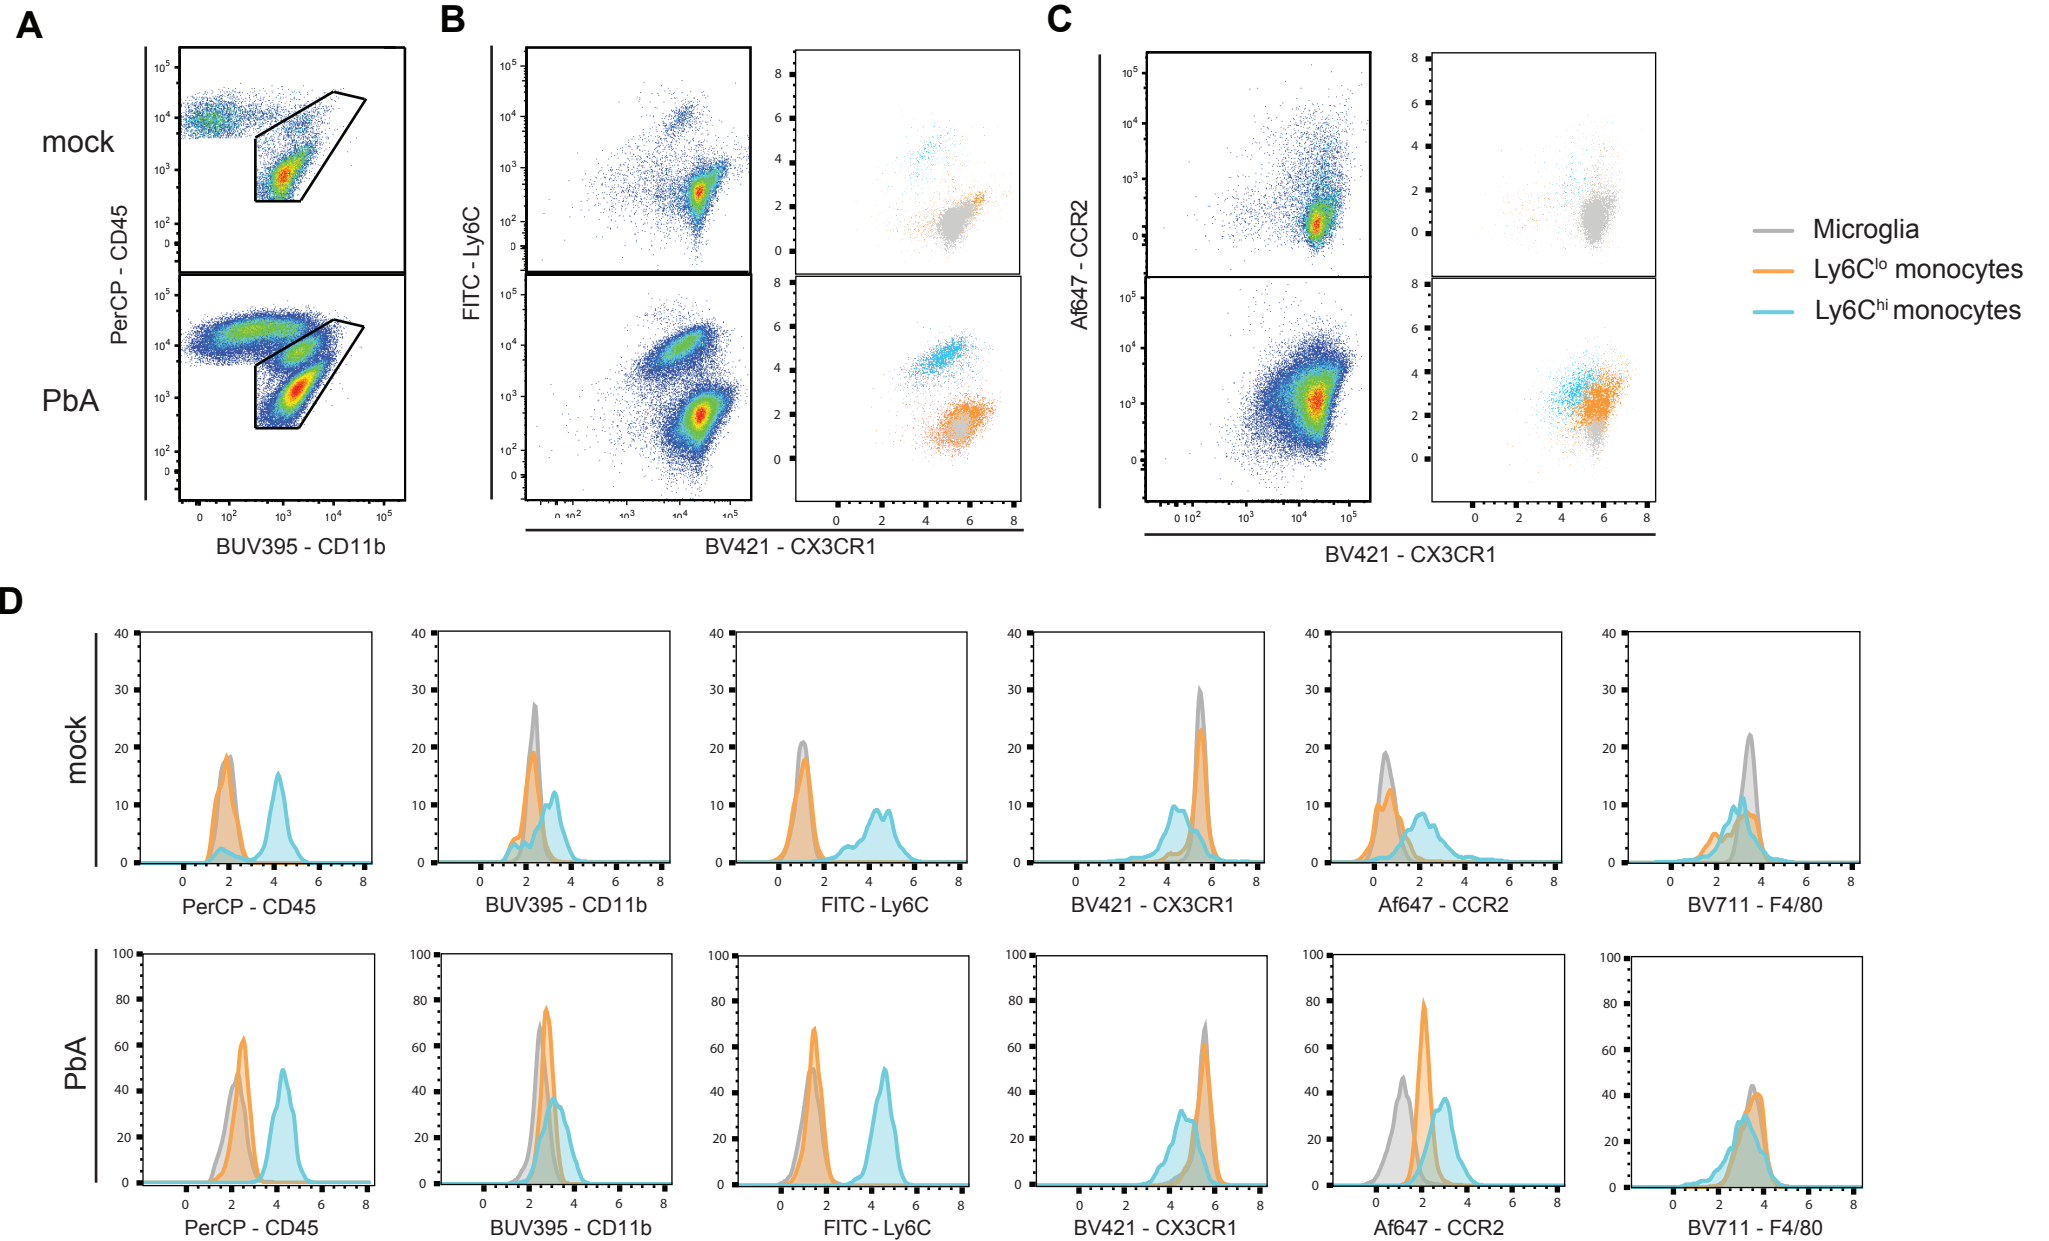

### Supplementary figure 2. Detailed analysis of CD11b<sup>+</sup> brain population

**A** Gating of the CD11b<sup>+</sup> population in the brain of mock- and d8 p.i. PbA-infected mice. **B-C** Dot plots of the CD11b<sup>+</sup> population plotted as Ly6C vs CX3CR1 (**B**) and CCR2 vs CX3CR1 (**C**) by manual analysis in FlowJo (left panels) and by overlaying the three populations from tSNE analysis onto the same plot (right panels). **D** Representative histograms showing expression of markers on the three myeloid populations resolved by tSNE in the brains of mock- and PbA-infected mice.

### Supplementary figure 3

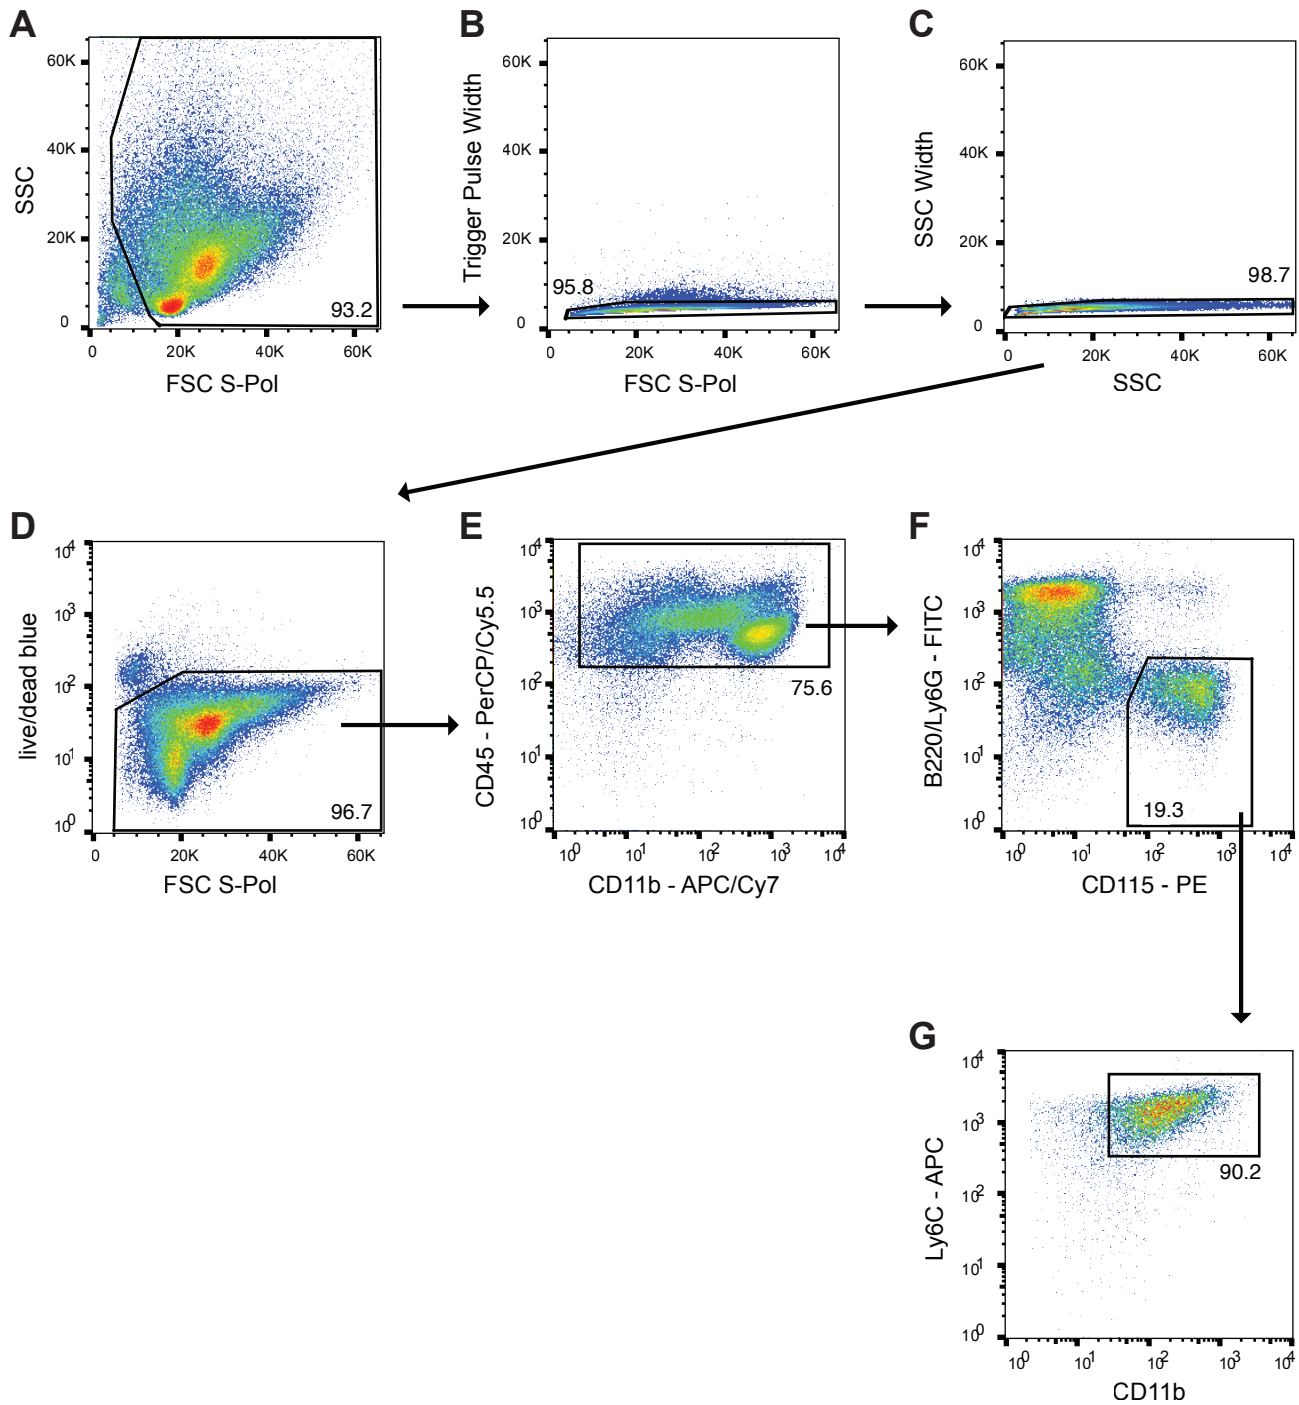

**Supplementary figure 3. Gating strategy for sorting Ly6C<sup>hi</sup> monocytes from bone marrow isolates**  
Representative sequential flow cytometric gating used to sort Ly6C<sup>hi</sup> monocytes from the bone marrow. Exclusion of debris (A), doublets (B and C) and dead cells (D) was applied. Subsequently CD45<sup>+</sup> leukocytes were gated (E) and B220-Ly6G-CD115<sup>+</sup> monocytes (F) were selected. Of these, CD11b<sup>+</sup> monocytes with high expression of Ly6C were sorted (G).

## Supplementary figure 4

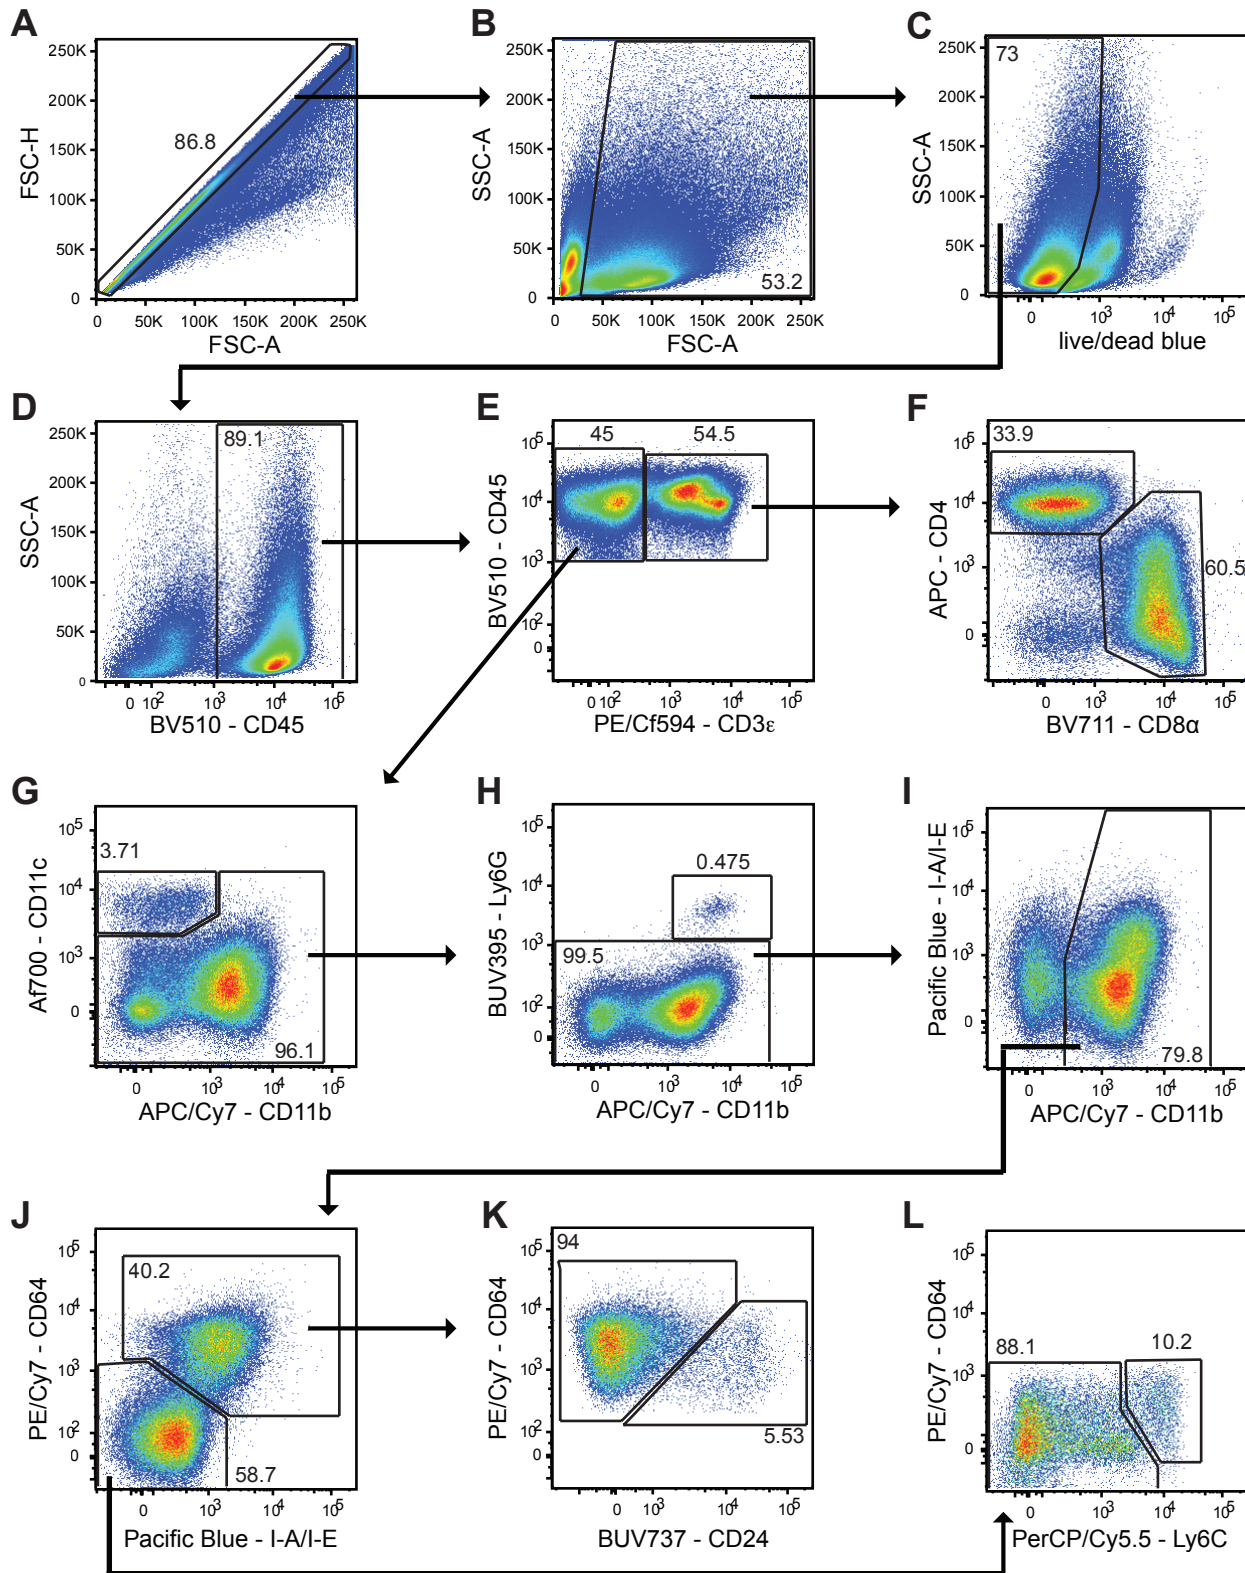

### Supplementary figure 4. Gating strategy of the lung

Representative sequential flow cytometric gating used to identify cell populations in the PbA-infected lung on d8 p.i. Doublets (A), debris (B) and dead cells (C) were excluded. CD45 expression was used to gate the total leukocyte population (D). T cells were identified as CD3 $\epsilon$ <sup>+</sup> (E) and further characterised as CD4<sup>+</sup> or CD8<sup>+</sup> (F). In the CD3 $\epsilon$ <sup>+</sup> population, alveolar macrophages were identified as CD11c<sup>+</sup> CD11b<sup>lo</sup> (G). Neutrophils were gated as CD11b<sup>+</sup> Ly6G<sup>+</sup> (H). The remaining CD11b<sup>+</sup> population (I) was split into CD64<sup>-</sup> MHC-II<sup>-</sup> cells and CD64<sup>+</sup>/MHC-II<sup>+</sup> (J). Subsequently, CD64 and CD24 expression of CD64<sup>+</sup>/MHC-II<sup>+</sup> cells was used to identify CD24<sup>-</sup> interstitial macrophages and CD24<sup>+</sup> CD11b<sup>+</sup> DC (K). CD64<sup>-</sup> MHC-II<sup>-</sup> cells were divided into Ly6C<sup>lo</sup> and Ly6C<sup>hi</sup> monocytes (L).

## Supplementary figure 5

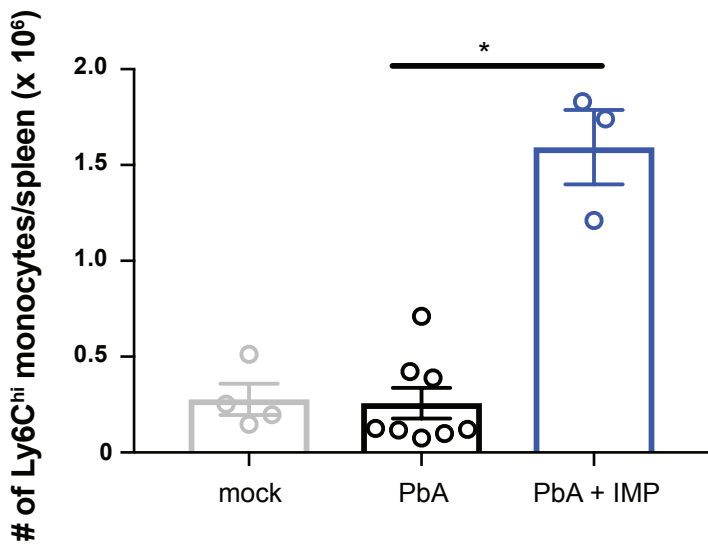

### Supplementary figure 5. Ly6C<sup>hi</sup> monocytes accumulate in the spleen of IMP-treated mice

The number of Ly6C<sup>hi</sup> monocytes in the spleen of mock-infected, PbA-infected and PbA-infected, IMP-treated mice on d8 p.i. Data represents 1 experiment with a total n of 3-8 mice per group, shown as mean  $\pm$  SEM and analysed using a Kruskal-Wallis test with a Dunn's multiple comparison test.

## Supplementary Figure 6

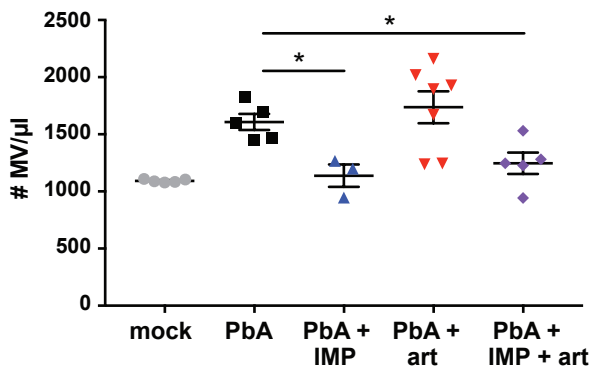

### Supplementary figure 6. Effect of treatment on circulating microvesicles

Number of circulating microvesicles per microlitre of platelet-free plasma in mock-infected mice, and in PbA-infected mice, comparing IMP, artesunate or combination treatment from d7 p.i. with untreated controls. Data represents 1 experiment with a total n of 3-7 mice per group shown as mean  $\pm$  SEM and were analysed using a Mann-Whitney test.

## Supplementary Figure 7

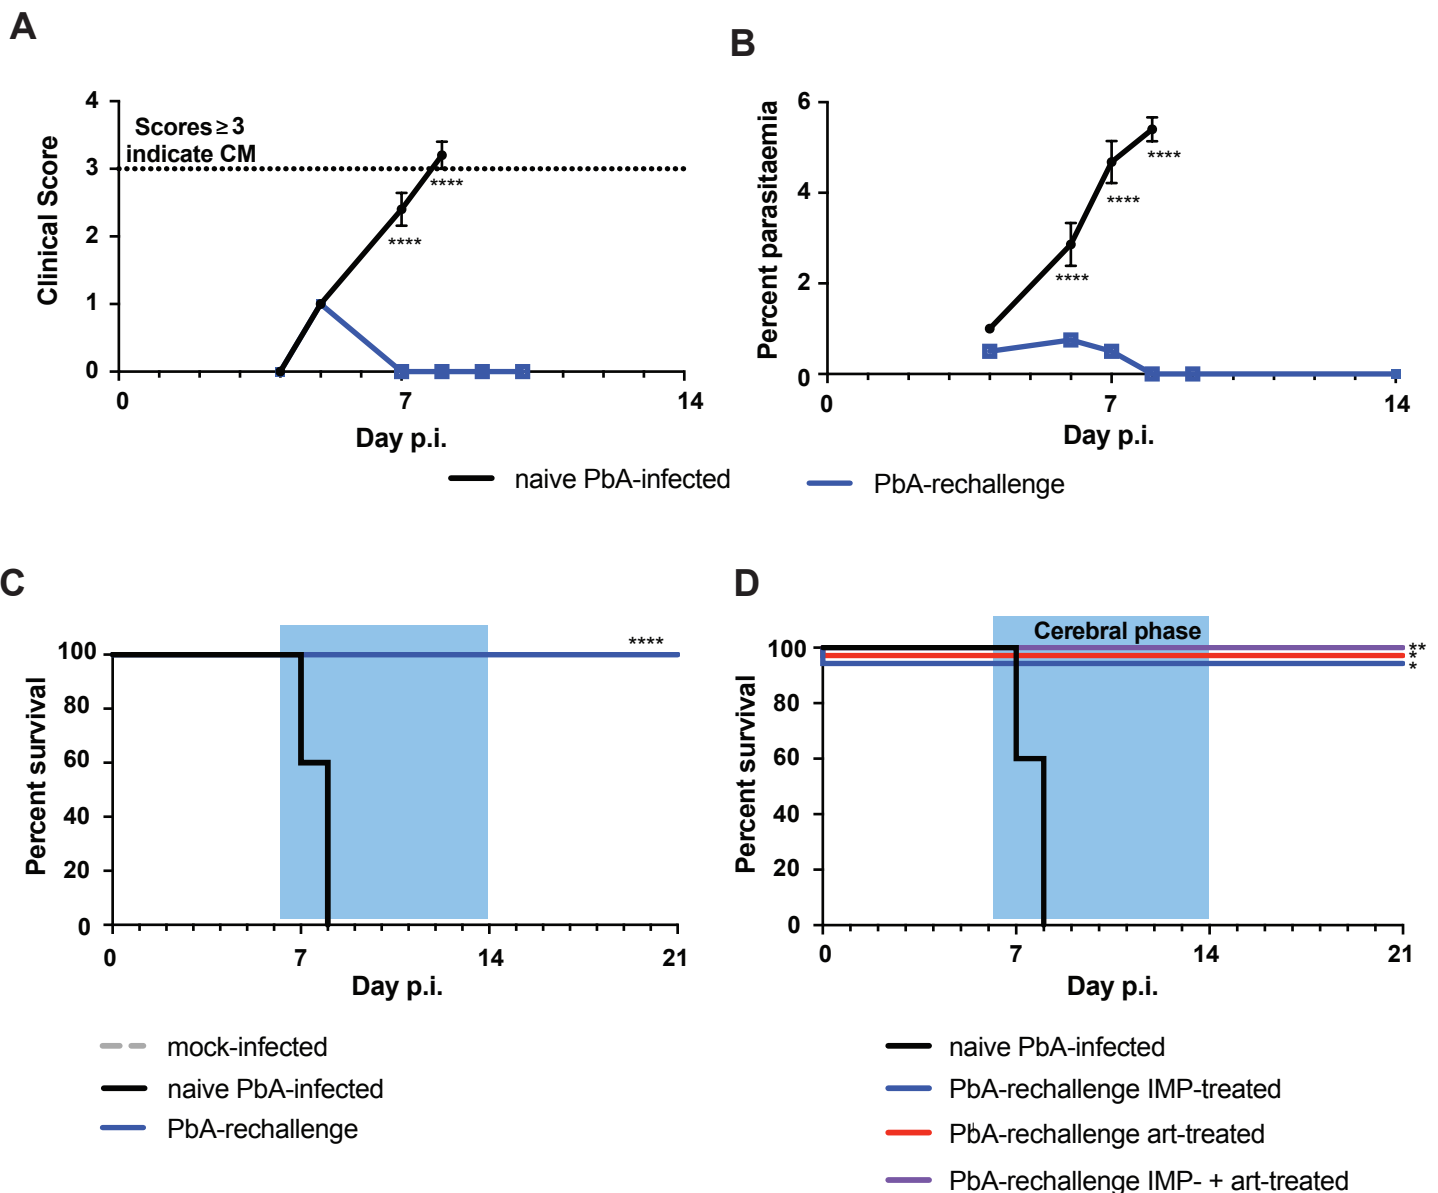

### Supplementary figure 7. Treated PbA-infected mice are protected during reinfection

**A-B** Clinical scores (**A**) and parasitaemia (**B**) in previously successfully treated mice, reinfected on d35 p.i., compared to naïve PbA-infected mice. **C** Survival of mice reinfected with PbA, following previous successful early IMP treatment, compared with untreated controls. The acute phase of mortality, observed during the second week post-PbA-infection, is denoted by the blue box. **D** Survival of mice reinfected with PbA, following previous successful late IMP, artesunate or combination treatment, compared with untreated controls. All rechallenged groups had 100% survival, but the lines have been separated for clarity. The acute phase of mortality, observed during the second week post-PbA-infection, is denoted by the blue box. Data in figures A-C represents 3 separate experiments with a total n of 5-16 mice per group and data in figure D represents 2 separate experiments with a total n of 3-6 mice per group. Data in figures A-B are shown as mean  $\pm$  SEM and analysed using a Kruskal-Wallis test with a Dunn's multiple comparison test comparing all groups at each timepoint. Data in figure C and D were compared using the Mantel-Cox log-rank test.

|        |      | Microglia     | Ly6C <sup>lo</sup><br>monocytes | Ly6C <sup>hi</sup><br>monocytes |
|--------|------|---------------|---------------------------------|---------------------------------|
| CD45   | mock | 2.032 ± 0.015 | 2.815 ± 0.034                   | 3.848 ± 0.115                   |
|        | PbA  | 2.050 ± 0.055 | 2.775 ± 0.076                   | 4.463 ± 0.090                   |
| Ly6C   | mock | 1.320 ± 0.028 | 1.718 ± 0.057                   | 3.993 ± 0.051                   |
|        | PbA  | 1.243 ± 0.034 | 1.628 ± 0.062                   | 4.348 ± 0.045                   |
| F4/80  | mock | 3.328 ± 0.050 | 4.043 ± 0.061                   | 2.753 ± 0.107                   |
|        | PbA  | 2.848 ± 0.200 | 3.518 ± 0.105                   | 3.053 ± 0.230                   |
| CD80   | mock | 1.678 ± 0.009 | 2.355 ± 0.069                   | 1.563 ± 0.123                   |
|        | PbA  | 1.595 ± 0.033 | 2.510 ± 0.082                   | 3.058 ± 0.288                   |
| MHC-II | mock | 2.923 ± 0.048 | 4.018 ± 0.075                   | 3.663 ± 0.135                   |
|        | PbA  | 3.080 ± 0.042 | 3.920 ± 0.042                   | 4.648 ± 0.220                   |
| CX3CR1 | mock | 5.480 ± 0.064 | 5.553 ± 0.094                   | 4.495 ± 0.103                   |
|        | PbA  | 5.043 ± 0.202 | 5.483 ± 0.074                   | 4.448 ± 0.122                   |
| CD86   | mock | 1.005 ± 0.006 | 1.180 ± 0.018                   | 1.045 ± 0.013                   |
|        | PbA  | 1.005 ± 0.006 | 1.088 ± 0.017                   | 1.068 ± 0.013                   |
| CCR2   | mock | 1.080 ± 0.021 | 2.480 ± 0.076                   | 2.076 ± 0.015                   |
|        | PbA  | 1.278 ± 0.050 | 2.505 ± 0.095                   | 2.960 ± 0.158                   |

**Supplementary table 1. MFI of brain populations in tSNE analysis**

MFI of indicated markers on populations in the brain of mock- and PbA-infected mice on d8 p.i., as determined by tSNE analysis. Fluorescent markers are scaled during tSNE analysis and range from 0-6.



|               |      | <b>Alveolar<br/>macrophages</b> | <b>Interstitial<br/>macrophages</b> | <b>Ly6C<sup>lo</sup><br/>monocytes</b> |
|---------------|------|---------------------------------|-------------------------------------|----------------------------------------|
| <b>CCR2</b>   | mock | 3.477 ± 0.055                   | 3.737 ± 0.006                       | 2.590 ± 0.044                          |
|               | PbA  | 4.565 ± 0.304                   | 4.965 ± 0.007                       | 2.800 ± 0.057                          |
| <b>CD86</b>   | mock | 2.817 ± 0.055                   | 2.683 ± 0.108                       | 2.300 ± 0.010                          |
|               | PbA  | 2.970 ± 0.001                   | 2.745 ± 0.021                       | 2.240 ± 0.001                          |
| <b>CD11b</b>  | mock | 3.433 ± 0.035                   | 6.000 ± 0.096                       | 5.877 ± 0.081                          |
|               | PbA  | 4.220 ± 0.2545                  | 6.000 ± 0.064                       | 5.355 ± 0.163                          |
| <b>CX3CR1</b> | mock | 3.767 ± 0.032                   | 4.533 ± 0.091                       | 2.853 ± 0.072                          |
|               | PbA  | 4.330 ± 0.3677                  | 4.770 ± 0.014                       | 3.370 ± 0.255                          |
| <b>MHC-II</b> | mock | 5.350 ± 0.030                   | 5.720 ± 0.125                       | 3.170 ± 0.060                          |
|               | PbA  | 5.000 ± 0.056                   | 5.635 ± 0.106                       | 2.665 ± 0.049                          |
| <b>CD80</b>   | mock | 4.766 ± 0.091                   | 2.49 ± 0.1769                       | 1.191 ± 0.099                          |
|               | PbA  | 3.750 ± 0.665                   | 4.125 ± 0.007                       | 1.905 ± 0.050                          |
| <b>CD206</b>  | mock | 5.086 ± 0.070                   | 3.080 ± 0.265                       | 1.923 ± 0.006                          |
|               | PbA  | 2.820 ± 0.679                   | 1.650 ± 0.184                       | 2.070 ± 0.042                          |
| <b>Ly6C</b>   | mock | 4.573 ± 0.035                   | 4.240 ± 0.261                       | 3.110 ± 0.115                          |
|               | PbA  | 4.235 ± 0.304                   | 5.945 ± 0.007                       | 3.060 ± 0.071                          |
| <b>CD64</b>   | mock | 5.333 ± 0.049                   | 4.733 ± 0.072                       | 2.327 ± 0.023                          |
|               | PbA  | 5.120 ± 0.537                   | 5.650 ± 0.226                       | 2.385 ± 0.064                          |

**Supplementary table 2. MFI of lung populations in tSNE analysis**

MFI of indicated markers on populations in the lung of mock- and PbA-infected mice on d8 p.i., as determined by tSNE analysis. Fluorescent markers are scaled during tSNE analysis and range from 0-6.
